# Supplementary material
Source: PubMed Central journal article supplement (PMC4780527)
Supplement: rstb20150184supp1.pdf [file rstb20150184supp1.pdf]

Supplementary Information

**Environmental and genetic effects on innovativeness in a natural population of birds**

John L. Quinn<sup>1,2\*</sup>, Ella F. Cole<sup>2</sup>, Thomas Reed<sup>1</sup>, and Julie Morand-Ferron<sup>3</sup>

<sup>1</sup>School of BEES, University College Cork, North Mall, Cork, Ireland.

<sup>2</sup>Edward Grey Institute, Department of Zoology, University of Oxford, Oxford, UK.

<sup>3</sup>Department of Biology, University of Ottawa, Canada

\* corresponding author: [j.quinn@ucc.ie](mailto:j.quinn@ucc.ie)

**Consisting of one Figure and 1 Table.**

**Figure S1**

**Table S1.**

**Figure S1.** Innovative problem solving performance with respect to natal origin (whether birds were immigrants or Wytham born) and when the winter season assays were conducted. P values taken from post hoc tests of individual winter seasons with all main effects in the model Time of season, Age, Sex, EB and natal origin). Numbers in bars refer to percentages and sample sizes.

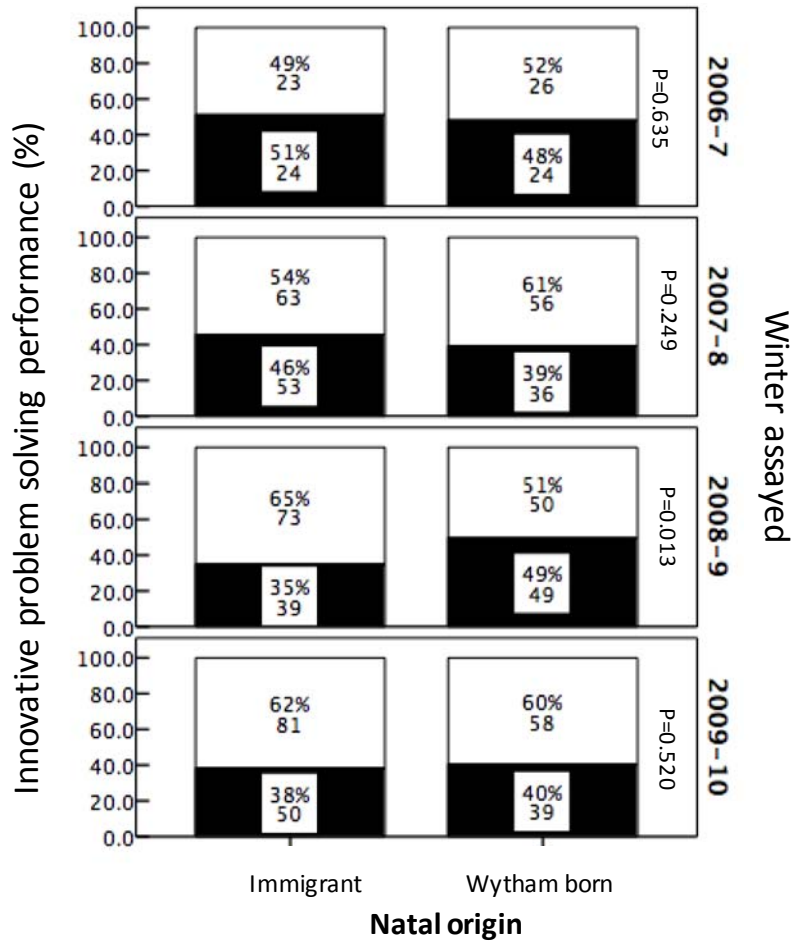

**Table S1.** Summary statistics for the pruned pedigree for the Wytham Woods study population. This refers to the reduced data set consisting only of those individuals that are informative with respect to the estimation of heritability of problem solving ability, given the phenotypic data collected as part of this study. Pairwise relatedness coefficients ( $r$ ) refer to the probability that any two individuals share an allele due to recent common ancestry (e.g.  $r = 0.5$  for full sibs,  $r = 0.25$  for half sibs). The table gives mean  $r$  across all pairs of individuals and proportions of  $r$  equal to or greater than several thresholds. Note that the number of records is greater than the number of individuals innovativeness is measured for because close relatives are informative in the animal model analyses.

| <b>Quantity</b>                         | <b>Value</b> |
|-----------------------------------------|--------------|
| Records                                 | 3404         |
| Maternities                             | 1798         |
| Paternities                             | 1798         |
| Full sibs                               | 409          |
| Maternal sibs                           | 645          |
| Maternal half-sibs                      | 236          |
| Paternal sibs                           | 588          |
| Paternal half-sibs                      | 179          |
| Maternal grandmothers                   | 967          |
| Maternal grandfathers                   | 968          |
| Paternal grandmothers                   | 967          |
| Paternal grandfathers                   | 966          |
| Maximum pedigree depth<br>(generations) | 35           |
| Founders                                | 1605         |
| Mean maternal sibship size              | 1.34         |
| Mean paternal sibship size              | 1.32         |
| Nonzero $F$                             | 202          |
| $F > 0.125$                             | 8            |
| Mean pairwise relatedness               | <0.001       |

| <b>Quantity</b>                   | <b>Value</b> |
|-----------------------------------|--------------|
| Pairwise relatedness $\geq 0.125$ | 0.003        |
| Pairwise relatedness $\geq 0.25$  | 0.002        |
| Pairwise relatedness $\geq 0.5$   | 0.001        |
